# Supplementary material for: Prognosis and Reclassification by YKL‐40 in Stable Coronary Artery Disease
Source: PubMed Central journal article supplement — J Am Heart Assoc. 2020 Mar 2;9(5):e014634. doi: 10.1161/JAHA.119.014634 (PMC7335588; doi:10.1161/jaha.119.014634), 2020-03-02
Supplement: JAH3-9-e014634-s001.pdf [file JAH3-9-e014634-s001.pdf]

# **Supplemental Material**

**Table S1. Cumulative number of outcomes, by subtype.**

---

| <b>Time period</b> | <b>AMI</b> | <b>UAP</b> | <b>Ce-VD</b> | <b>CV-death</b> | <b>Death</b> |
|--------------------|------------|------------|--------------|-----------------|--------------|
| year $\leq$ 1      | 46         | 68         | 38           | 28              | 52           |
| year $\leq$ 2      | 128        | 121        | 76           | 56              | 111          |
| year $\leq$ 3      | 181        | 175        | 109          | 88              | 171          |
| year $\leq$ 4      | 232        | 228        | 145          | 127             | 251          |
| year $\leq$ 5      | 270        | 262        | 174          | 151             | 314          |
| year $\leq$ 6      | 310        | 286        | 203          | 183             | 388          |
| year $\leq$ 7      | 344        | 305        | 227          | 223             | 470          |
| year $\leq$ 8      | 382        | 325        | 247          | 271             | 573          |
| year $\leq$ 9      | 414        | 341        | 278          | 302             | 644          |

---

AMI, acute myocardial infarction; UAP, unstable angina pectoris; Ce-VD; cerebrovascular disease, CV-death; cardiovascular death

**Table S2. Composite outcome hazard ratios (HR) of standard predictors when used alone and adjusted for the rest of the standard predictors in the placebo group of the CLARICOR trial.**

| Standard predictors                                  | Single predictor examined in the model (stratified by center) |                |          | All standard predictors in the model (stratified by center) |                |          |
|------------------------------------------------------|---------------------------------------------------------------|----------------|----------|-------------------------------------------------------------|----------------|----------|
|                                                      | HR                                                            | 95% CI of HR   | P values | HR                                                          | 95% CI of HR   | P values |
| <b>Demographics and history</b>                      |                                                               |                |          |                                                             |                |          |
| Sex (male=1)                                         | 1.004                                                         | 0.889 to 1.134 | 0.95     | 1.150                                                       | 1.005 to 1.315 | 0.042    |
| Age/year                                             | 1.024                                                         | 1.013 to 1.034 | <0.0001  | 1.013                                                       | 1.001 to 1.025 | 0.030    |
| Age-time/year-year                                   | 1.00374                                                       | 1.002 to 1.006 | 0.0004   | 1.004                                                       | 1.002 to 1.006 | <0.0001  |
| Smoking status (ex-smoker compared to never smoking) | 1.203                                                         | 1.026 to 1.410 | 0.0062   | 1.210                                                       | 1.025 to 1.428 | <0.0001  |
| Smoking status (smoking compared to never smoking)   | 1.309                                                         | 1.110 to 1.545 |          | 1.547                                                       | 1.300 to 1.842 |          |
| Hypertension, Y/N                                    | 1.105                                                         | 0.985 to 1.239 | 0.090    | 0.991                                                       | 0.870 to 1.129 | 0.89     |
| Diabetes, Y/N                                        | 1.318                                                         | 1.133 to 1.533 | 0.0003   | 1.261                                                       | 1.076 to 1.480 | 0.0043   |
| Previous AMI, Y/N                                    | 1.169                                                         | 1.033 to 1.324 | 0.014    | 1.151                                                       | 1.012 to 1.308 | 0.032    |
| <b>Medication at randomization</b>                   |                                                               |                |          |                                                             |                |          |
| Aspirin, Y/N                                         | 0.978                                                         | 0.820 to 1.165 | 0.80     | 1.021                                                       | 0.852 to 1.225 | 0.82     |
| Beta-blocker, Y/N                                    | 1.010                                                         | 0.893 to 1.141 | 0.88     | 1.013                                                       | 0.888 to 1.155 | 0.85     |
| Calcium antagonist, Y/N                              | 1.232                                                         | 1.095 to 1.385 | 0.0005   | 1.121                                                       | 0.982 to 1.279 | 0.090    |
| ACE inhibitor, Y/N                                   | 1.246                                                         | 1.099 to 1.412 | 0.0006   | 1.054                                                       | 0.916 to 1.213 | 0.46     |
| Long-lasting nitrate, Y/N                            | 1.738                                                         | 1.527 to 1.978 | <0.0001  | 1.348                                                       | 1.172 to 1.551 | <0.0001  |
| Diuretics, Y/N                                       | 1.613                                                         | 1.437 to 1.810 | <0.0001  | 1.180                                                       | 1.030 to 1.352 | 0.017    |
| Digoxin, Y/N                                         | 2.212                                                         | 1.805 to 2.711 | <0.0001  | 1.576                                                       | 1.269 to 1.957 | <0.0001  |
| Statins, Y/N                                         | 0.746                                                         | 0.663 to 0.839 | <0.0001  | 0.883                                                       | 0.769 to 1.014 | 0.077    |
| Antiarrhythmic drugs, Y/N                            | 1.119                                                         | 0.763 to 1.642 | 0.56     | 0.924                                                       | 0.627 to 1.362 | 0.69     |
| <b>Biochemical predictors</b>                        |                                                               |                |          |                                                             |                |          |
| Log (CRP/mg/L)                                       | 1.171                                                         | 1.113 to 1.232 | <0.0001  | 1.070                                                       | 1.014 to 1.480 | 0.014    |
| ApoA1 mg/dL                                          | 0.905                                                         | 0.764 to 1.072 | 0.25     | 0.707                                                       | 0.516 to 0.969 | 0.031    |
| Log (ApoB/mg/dL)                                     | 1.165                                                         | 0.938 to 1.447 | 0.17     | 0.826                                                       | 0.413 to 1.651 | 0.59     |
| Cholesterol-HDL mmol/L                               | 0.954                                                         | 0.794 to 1.147 | 0.62     | 1.104                                                       | 0.714 to 1.708 | 0.66     |
| Cholesterol-LDL mmol/L                               | 1.027                                                         | 0.948 to 1.112 | 0.52     | 0.912                                                       | 0.751 to 1.107 | 0.35     |
| Log(cholesterol/mmol/L)                              | 1.247                                                         | 0.940 to 1.654 | 0.13     | 1.786                                                       | 0.577 to 5.525 | 0.31     |
| Log(triglyceride/mmol/L)                             | 1.024                                                         | 0.919 to 1.141 | 0.67     | 1.030                                                       | 0.878 to 1.208 | 0.72     |
| Glomerular filtration rate (GFR/mL/min)              | 0.985                                                         | 0.982 to 0.988 | <0.0001  | 0.995                                                       | 0.991 to 0.999 | 0.0084   |

Composite outcome including acute myocardial infarction, unstable angina pectoris, cerebrovascular disease and all-cause death. Time is years since randomisation, whereas age is age at randomization. HR = hazard factor associated with 1 unit increase, log values being natural logs.

AMI, acute myocardial infarction; ACE, angiotensin-converting enzyme; CRP, C-reactive protein; Apo, apolipoprotein; HDL, high-density lipoprotein; LDL, low-density lipoprotein; N, hypertension is not present; Y, hypertension is present.

**Table S3. Hazard ratios of YKL-40 when used alone and when adjusted for standard predictors in the clarithromycin group of the CLARICOR trial.**

| Outcome                     | YKL-40 used alone |              |          | YKL-40 adjusted for standard predictors |              |          |
|-----------------------------|-------------------|--------------|----------|-----------------------------------------|--------------|----------|
|                             | HR                | 95% CI of HR | P values | HR                                      | 95% CI of HR | P values |
| Unstable angina pectoris    | 1.10              | 0.93 to 1.29 | 0.26     | 1.05                                    | 0.88 to 1.26 | 0.58     |
| Acute myocardial infarction | 1.25              | 1.08 to 1.95 | 0.003    | 1.05                                    | 0.89 to 1.25 | 0.38     |
| Cerebrovascular disease     | 1.26              | 1.07 to 1.49 | 0.007    | 1.05                                    | 0.87 to 1.27 | 0.27     |
| Cardiovascular death        | 1.67              | 1.44 to 1.92 | <0.0001  | 1.27                                    | 1.07 to 1.51 | 0.007    |
| Composite outcome           | 1.38              | 1.27 to 1.50 | <0.0001  | 1.16                                    | 1.05 to 1.28 | 0.003    |
| All-cause mortality         | 1.67              | 1.51 to 1.84 | <0.0001  | 1.28                                    | 1.14 to 1.44 | <0.0001  |

Composite outcome including acute myocardial infarction, unstable angina pectoris, cerebrovascular disease and all-cause mortality. HR, hazard ratio.

**Table S4. The types and numbers of correct predictions obtained from the Cox proportional hazards model in the clarithromycin group of the CIARICOR trial.**

| <b>Composite outcome</b>               |                                          |                                |
|----------------------------------------|------------------------------------------|--------------------------------|
| <b>Prediction type</b>                 | <b>Standard predictors included (SP)</b> | <b>SP plus YKL-40 included</b> |
| True favorable predictions N (%)*      | 2763 (46.3)                              | 2772 (46.4)                    |
| True unfavorable predictions N (%)     | 1362 (22.8)                              | 1376 (23.0)                    |
| Total number of true predictions N (%) | 4125 (69.1)                              | 4148 (69.5)                    |
| <b>All-cause mortality</b>             |                                          |                                |
|                                        | <b>Standard predictors included (SP)</b> | <b>SP plus YKL-40 included</b> |
| True favorable predictions N (%)       | 4472 (74.9)                              | 4472 (74.9)                    |
| True unfavorable predictions N (%)     | 484 (8.11)                               | 488 (9.78)                     |
| Total number of true predictions N (%) | 4956 (83.0)                              | 4960 (83.1)                    |

For comparison results with standard predictors included, and with YKL-40 included, are shown

For each patient at time (T) equal to 3, 6 and 9 years and using the patient's individual survival curve the predicted outcome (patient 'alive at T' (favorable outcome) compared with patient 'not alive at T' (unfavourable outcome)) was read off the survival curve and the results compared with the observed outcome. When no covariates were included in the model, the Kaplan-Meier survival curve was used to calculate the predictions.

To allow for the fact that age violated the proportional hazard assumption we stratified by age categories in addition to center and excluded age from the covariates.

Total predictions = 5971, N(%) = true favorable predictions / total predictions
